# Supplementary material for: The impact of COVID-19 lockdown on surface air quality changes in major African countries
Source: Copernicus journal article supplement (doi:10.5194/egusphere-2024-2951), 2024-10-24
Supplement: Supplementary file 1 [file egusphere-2024-2951-supplement.pdf]

Supporting materials

# **The impact of COVID-19 lockdown on surface air quality changes in major African countries**

**Zizhen Han<sup>1</sup>, Yuqiang Zhang<sup>1\*</sup>, Zhou Liu<sup>1</sup>, Kexin Zhang<sup>2,3</sup>, Zhuqi Wang<sup>1</sup>, Bin Luo<sup>1</sup>, Likun Xue<sup>1</sup>,  
Xinfeng Wang<sup>1\*</sup>**

<sup>1</sup> Environmental Research Institute, Shandong University, Qingdao 266237, China

<sup>2</sup> School of Environmental Science and Engineering, Shandong University, Qingdao 266237, China

<sup>3</sup> Shenzhen Key Laboratory of Ecological Remediation and Carbon Sequestration, Institute of Environment and Ecology, Tsinghua Shenzhen International Graduate School, Tsinghua University, Shenzhen 518055, China

*Correspondence to:* Yuqiang Zhang ([yuqiang.zhang@sdu.edu.cn](mailto:yuqiang.zhang@sdu.edu.cn)), Xinfeng Wang ([xinfengwang@sdu.edu.cn](mailto:xinfengwang@sdu.edu.cn))

**Table S1 Stringency index weighted average of MAM and JJA seasons in major African countries**

| Country name         | Subregion | Season |       |
|----------------------|-----------|--------|-------|
|                      |           | MAM    | JJA   |
| Angola               | CA        | 63.22  | 77.01 |
| Cameroon             | CA        | 52.79  | 60.04 |
| Central African Rep. | CA        | 53.28  | 58.57 |
| Chad                 | CA        | 55.32  | 68.46 |
| Congo                | CA        | 68.67  | 69.39 |
| Dem. Rep. Congo      | CA        | 64.65  | 67.12 |
| Gabon                | CA        | 66.88  | 80.46 |
| Burundi              | EA        | 13.01  | 12.95 |
| Djibouti             | EA        | 67.95  | 55.10 |
| Ethiopia             | EA        | 60.98  | 80.56 |
| Kenya                | EA        | 74.54  | 80.21 |
| Madagascar           | EA        | 62.94  | 68.84 |
| Malawi               | EA        | 47.56  | 61.40 |
| Mozambique           | EA        | 45.20  | 75.61 |
| Rwanda               | EA        | 71.35  | 73.72 |
| S. Sudan             | EA        | 63.20  | 82.16 |
| Somalia              | EA        | 49.13  | 35.40 |
| Tanzania             | EA        | 39.67  | 30.43 |
| Uganda               | EA        | 72.72  | 85.95 |
| Zambia               | EA        | 43.59  | 48.31 |
| Zimbabwe             | EA        | 67.85  | 77.02 |
| Algeria              | NA        | 66.86  | 74.77 |
| Egypt                | NA        | 67.19  | 75.85 |
| Libya                | NA        | 78.02  | 92.13 |
| Morocco              | NA        | 78.25  | 73.64 |
| Sudan                | NA        | 68.54  | 77.04 |
| Tunisia              | NA        | 74.33  | 30.29 |
| Botswana             | SA        | 64.94  | 56.62 |
| eSwatini             | SA        | 70.01  | 79.65 |
| Lesotho              | SA        | 65.60  | 64.37 |
| Namibia              | SA        | 55.33  | 58.20 |
| South Africa         | SA        | 70.33  | 77.05 |
| Benin                | WA        | 52.05  | 41.84 |
| Burkina Faso         | WA        | 65.19  | 29.73 |
| Cote d'Ivoire        | WA        | 61.46  | 52.38 |
| Gambia               | WA        | 63.56  | 68.63 |
| Ghana                | WA        | 56.01  | 56.94 |
| Guinea               | WA        | 60.69  | 74.46 |
| Liberia              | WA        | 68.87  | 68.79 |
| Mali                 | WA        | 54.14  | 48.35 |

| Country name | Subregion | Season |       |
|--------------|-----------|--------|-------|
|              |           | MAM    | JJA   |
| Mauritania   | WA        | 62.97  | 51.21 |
| Niger        | WA        | 44.35  | 23.75 |
| Nigeria      | WA        | 65.43  | 77.58 |
| Senegal      | WA        | 61.87  | 51.07 |
| Sierra Leone | WA        | 54.52  | 43.63 |
| Togo         | WA        | 58.45  | 52.61 |

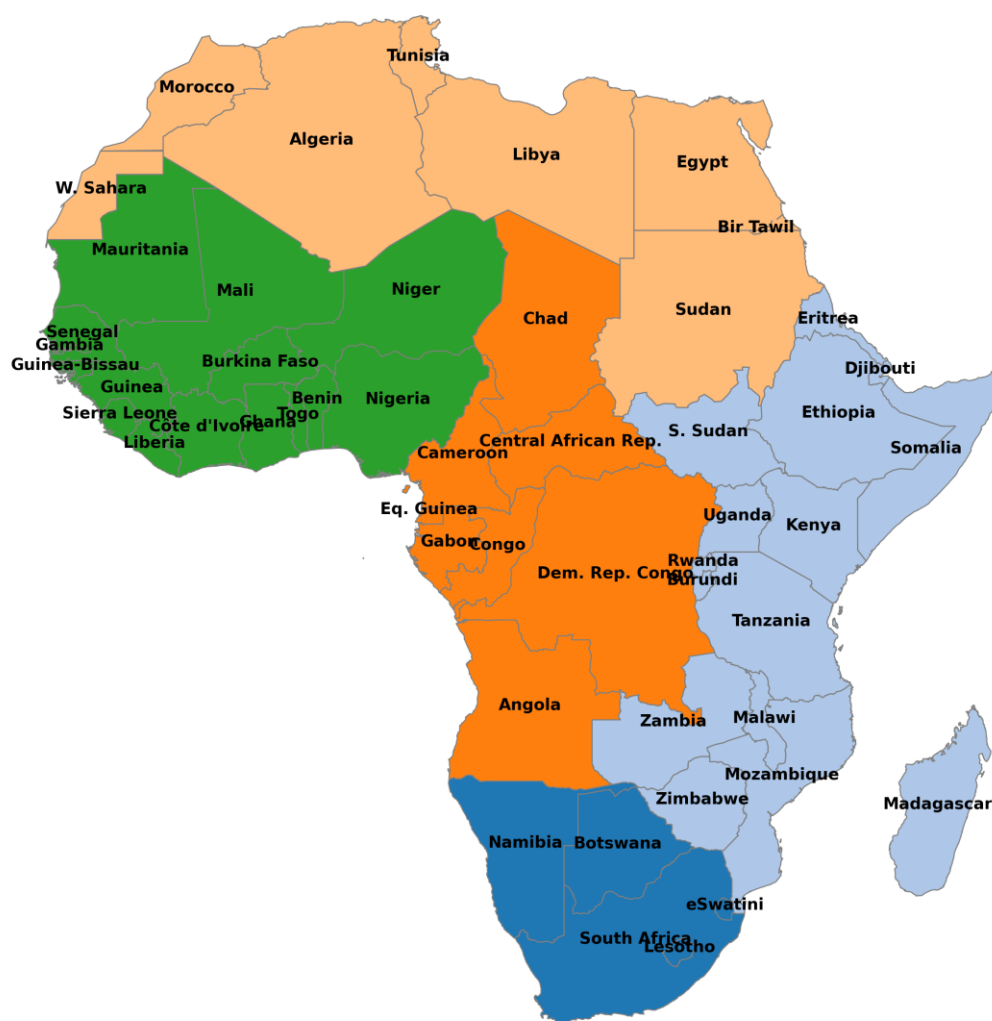

Figure S1: Map showing the study of selected African countries and their subregions. The different colors represent different regions of Africa, namely Northern Africa (NA) is light orange, Western Africa (WA) is green, Central Africa (CA) is orange, Eastern African (EA) is light blue and Southern Africa (SA) is dark blue.

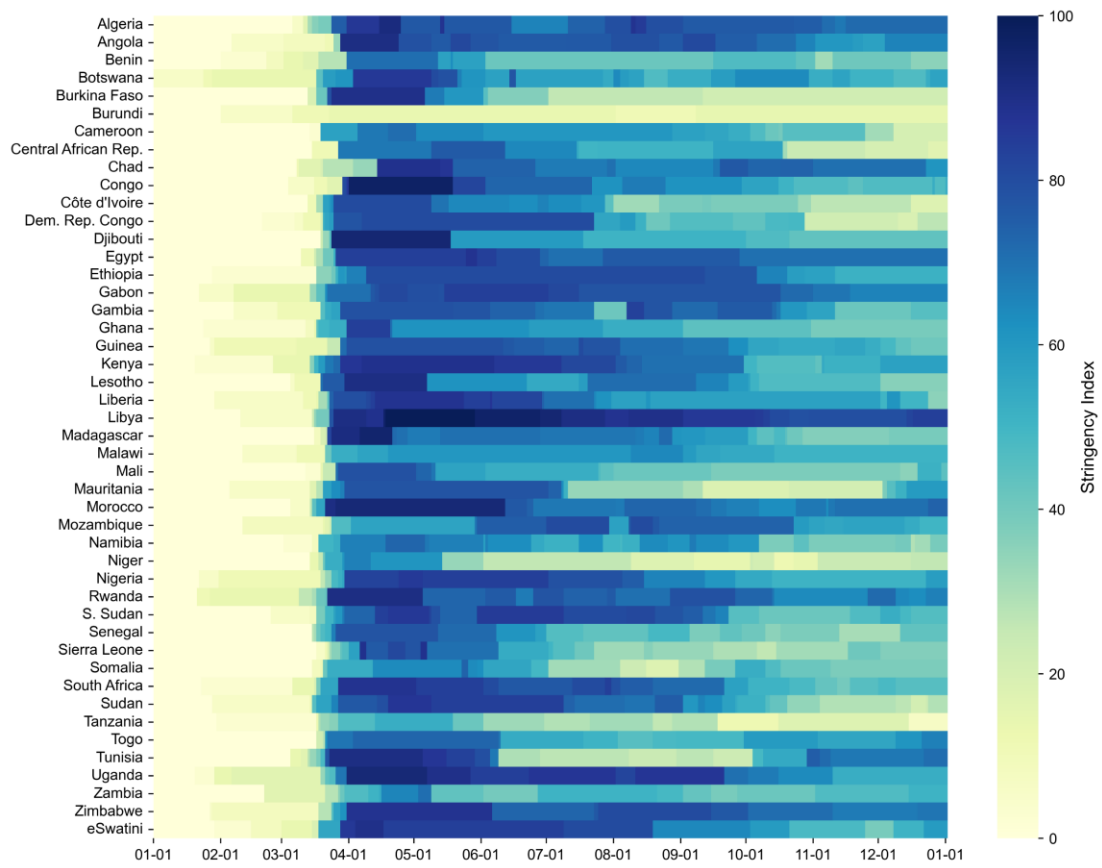

**Figure S2: Time distribution of containment stringency index for major African countries in 2020.**

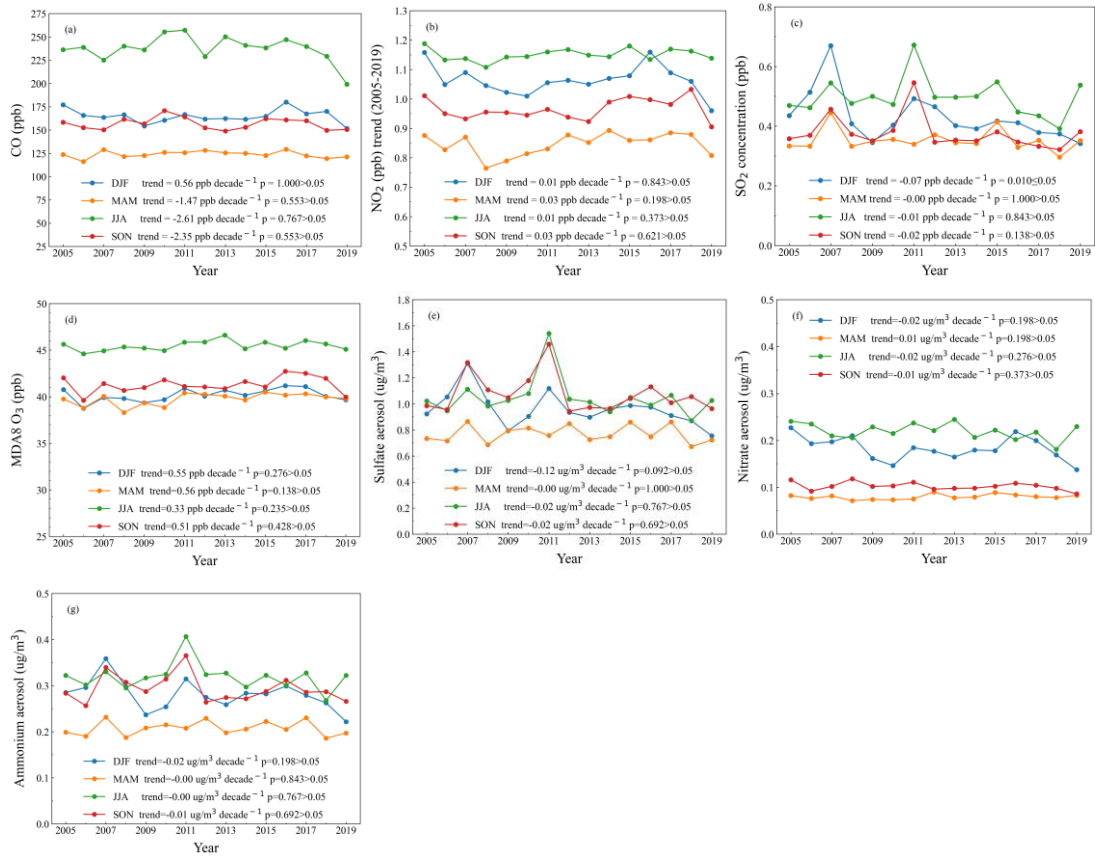

Figure S3: Long-term seasonal air quality trends in Africa from 2005 to 2019 for (a-g) CO, NO<sub>2</sub>, SO<sub>2</sub>, MDA8 O<sub>3</sub>, sulfate aerosol, nitrate aerosol and ammonium aerosol.

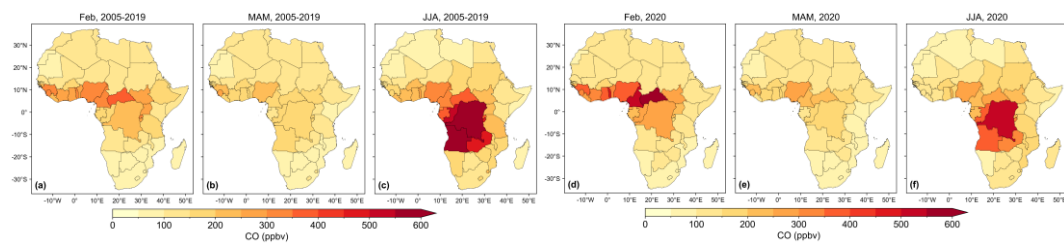

Figure S4: Spatial distribution of CO concentrations in February, MAM, and JJA of previous multiple year average from 2005 to 2019 (a-c), and those in 2020 (d-f).

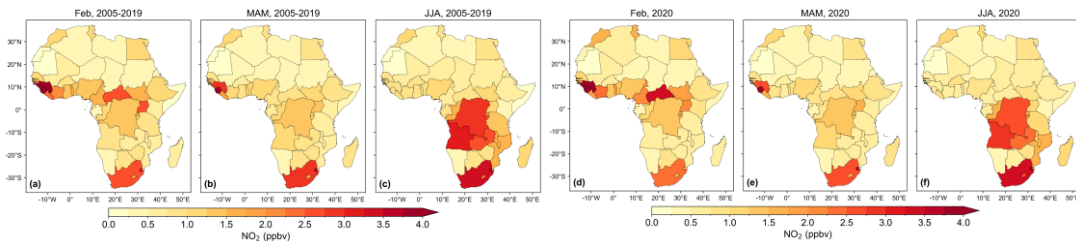

Figure S5: Same as Figure S3, but for NO<sub>2</sub>.

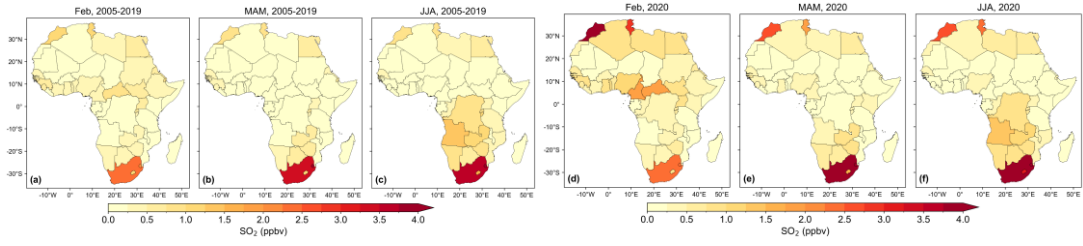

Figure S6: Same as Figure S3, but for SO<sub>2</sub>.

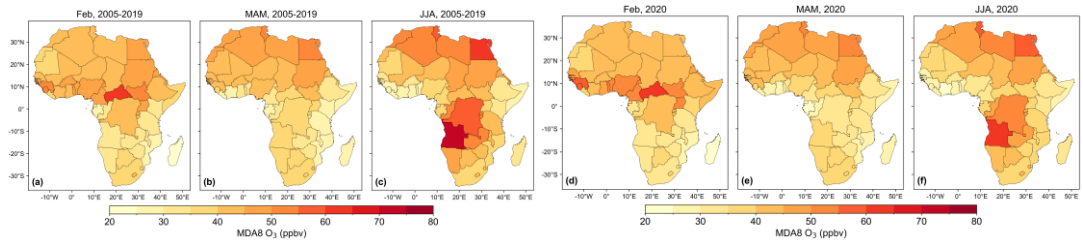

Figure S7: Same as Figure S3, but for MDA8 O<sub>3</sub>.

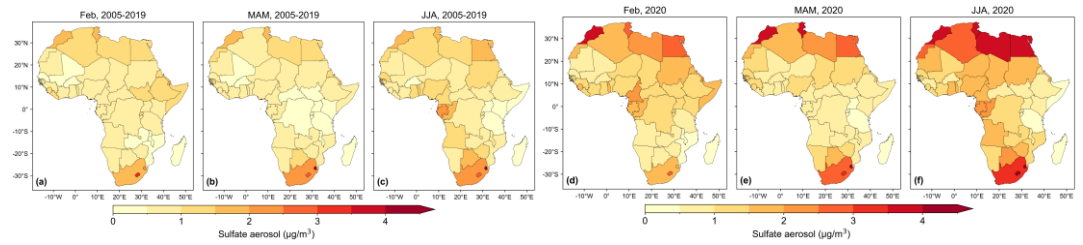

Figure S8: Same as Figure S3, but for sulfate aerosol.

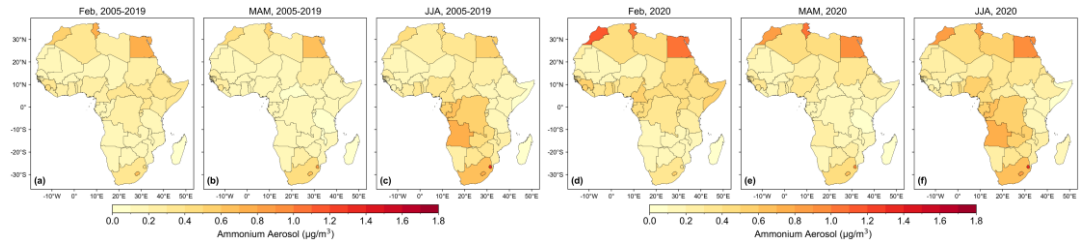

Figure S9: Same as Figure S3, but for ammonium aerosol.

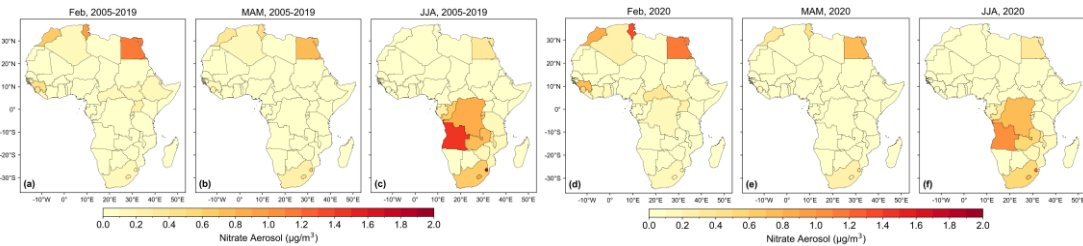

Figure S10: Same as Figure S3, but for nitrate aerosol.

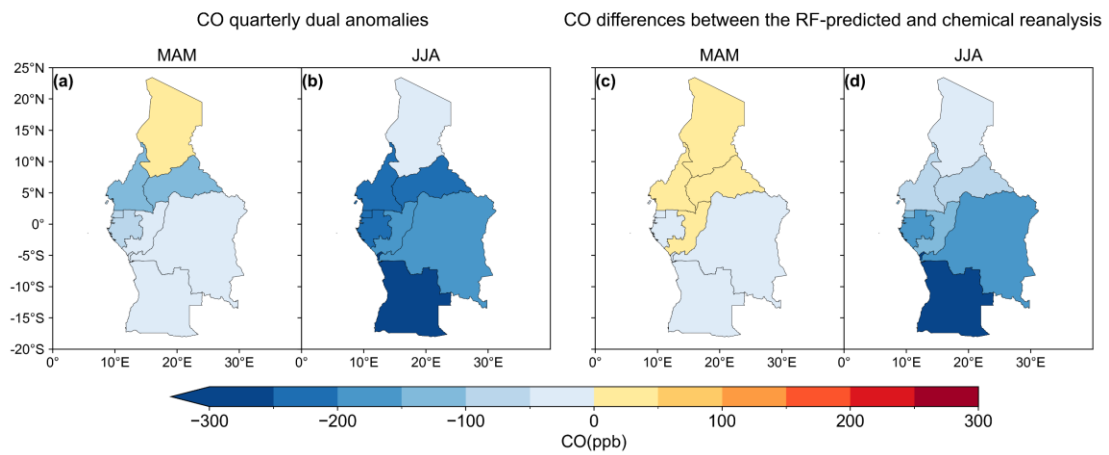

**Figure S11: Spatial distribution of CO quarterly dual anomalies in CA region estimated directly from the chemical reanalysis data (a, b), and the differences between chemical reanalysis and the RF-predicted CO for MAM and JJA in 2020 (c, d). The units are ppbv.**

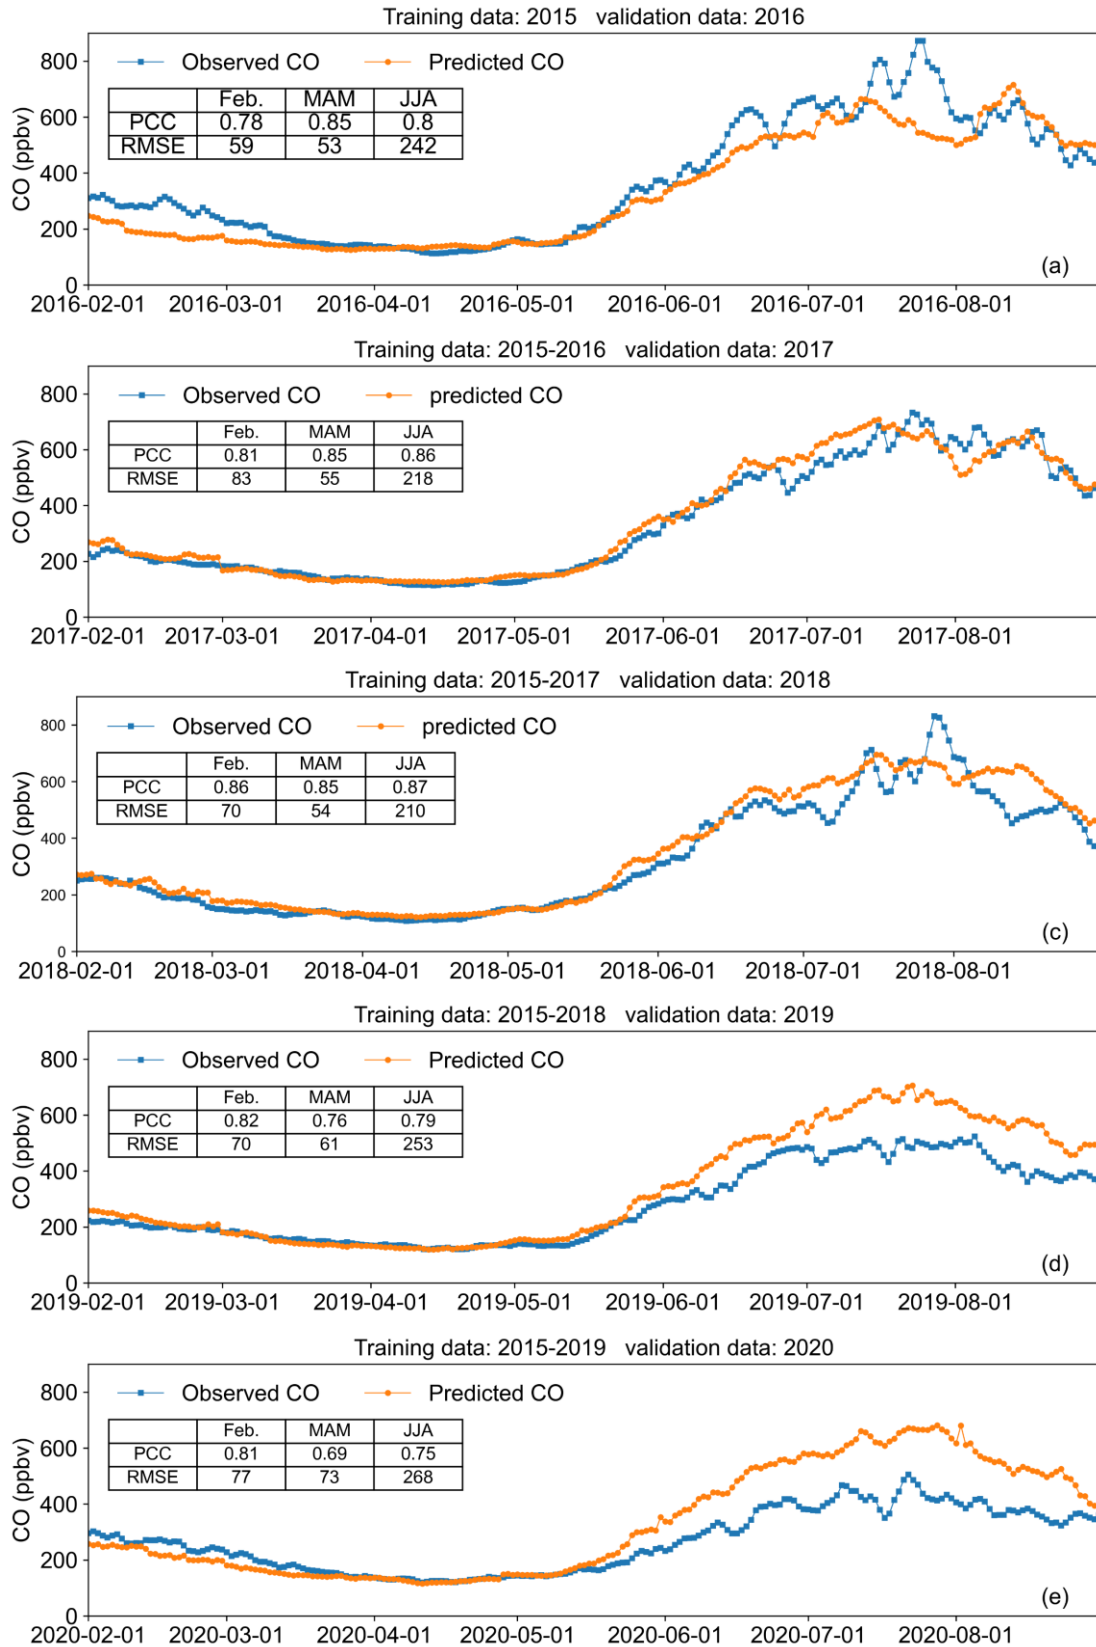

**Figure S12: Time series comparisons between the observed (dashed blue line) and predicted (square orange line) average CO in CA. Figure a-e represents the results of five different time-split sequence validation sets.**



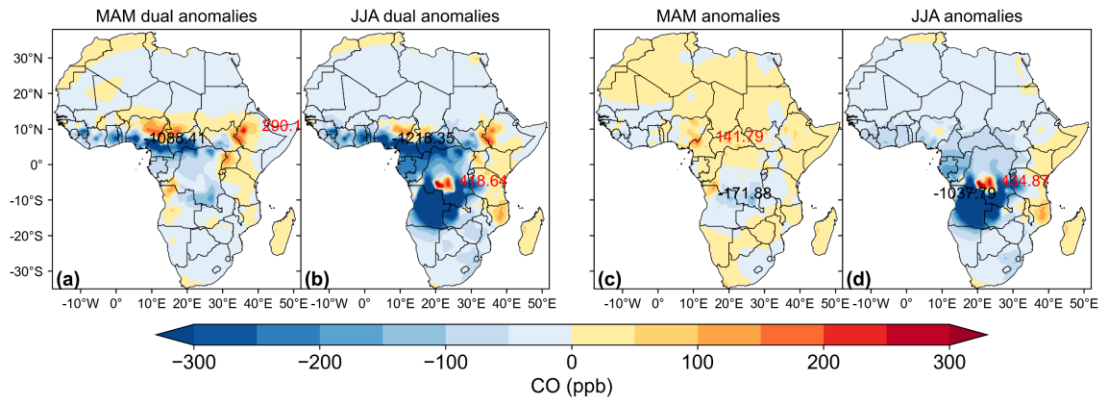

**Figure S13: Spatial distribution of CO quarterly dual anomalies (a, b), and quarterly anomalies (c, d) in MAM and JJA in African countries at grid level. The differences were calculated between 2020 and 15-year average (2005-2019). The units are ppbv.**

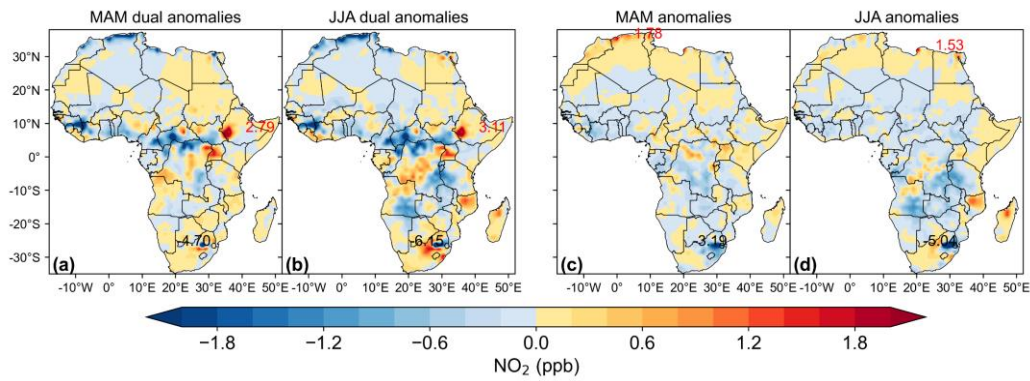

**Figure S14: Same as Figure S12, but NO<sub>2</sub>. The units are ppbv.**

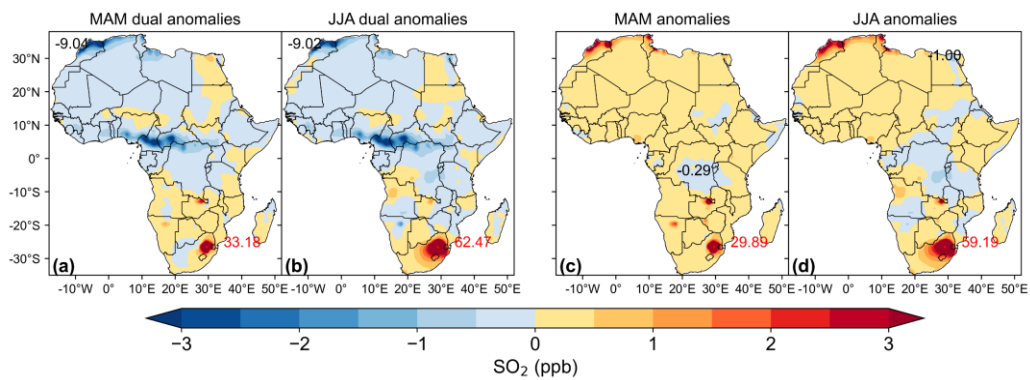

**Figure S15: Same as Figure S12, but SO<sub>2</sub>. The units are ppbv.**

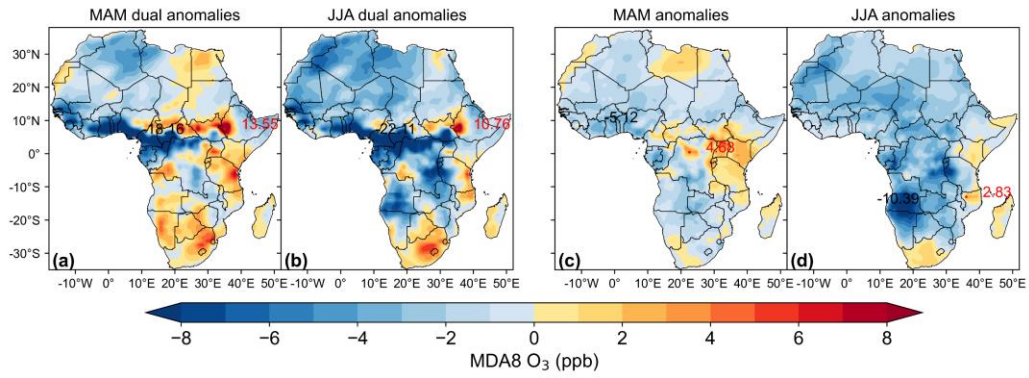

Figure S16: Same as Figure S12, but MDA8 O<sub>3</sub>. The units are ppbv.

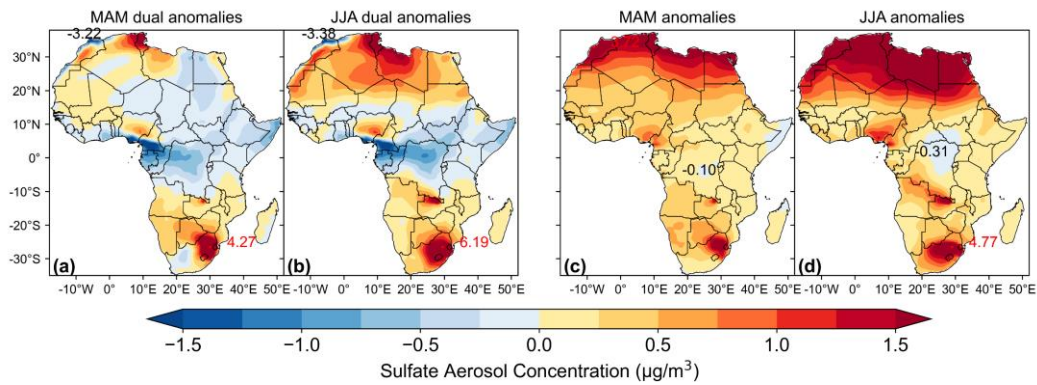

Figure S17: Same as Figure S12, but sulfate aerosol. The units are µg/m<sup>3</sup>.

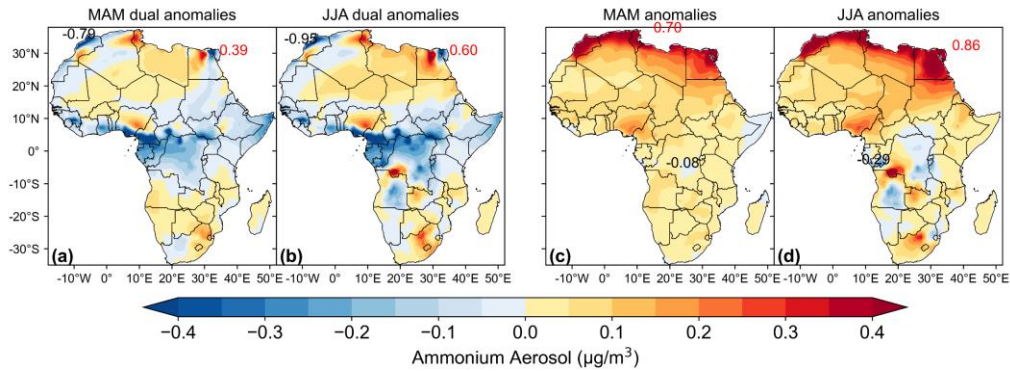

Figure S18: Same as Figure S12, but ammonium aerosol. The units are µg/m<sup>3</sup>.

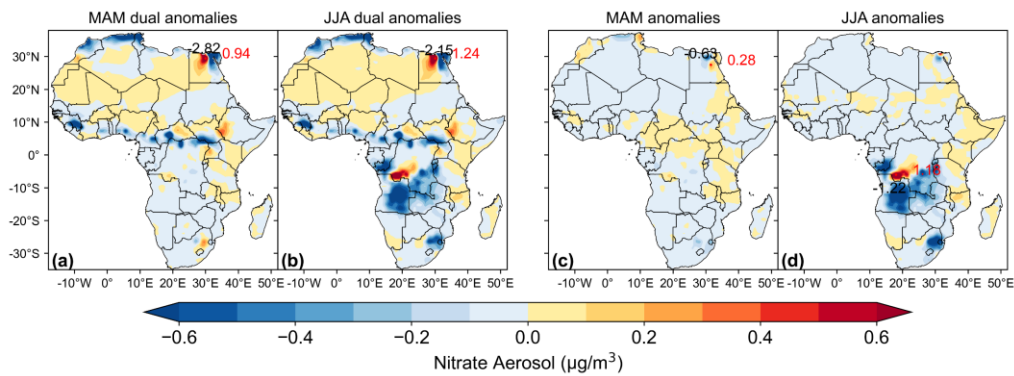

Figure S19: Same as Figure S12, but nitrate aerosol. The units are µg/m<sup>3</sup>.

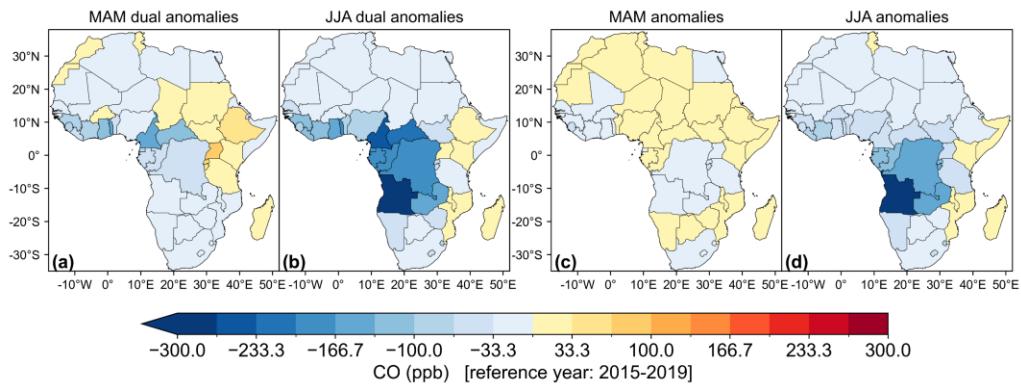

**Figure S20: Spatial distribution of CO quarterly dual anomalies (a, b), and quarterly anomalies (c, d) in MAM and JJA in African countries at country level. The differences were calculated between 2020 and 5-year average (2015-2019). The units are ppbv.**

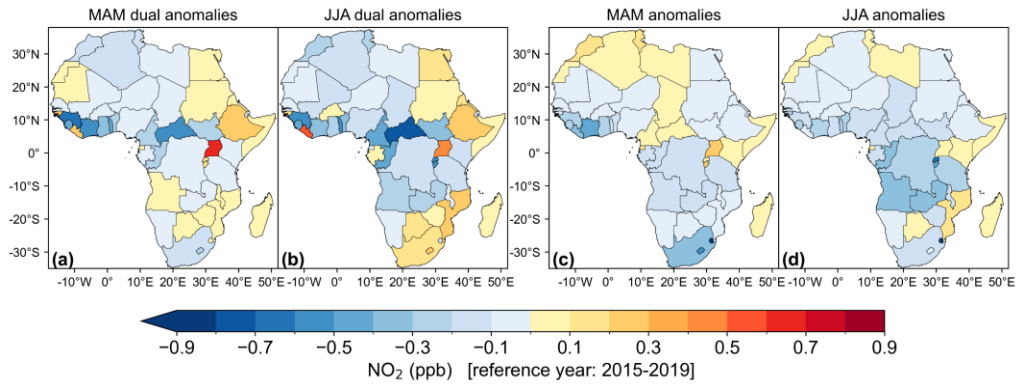

**Figure S21: The same as Fig. S19, but for NO<sub>2</sub>. The units are ppbv.**

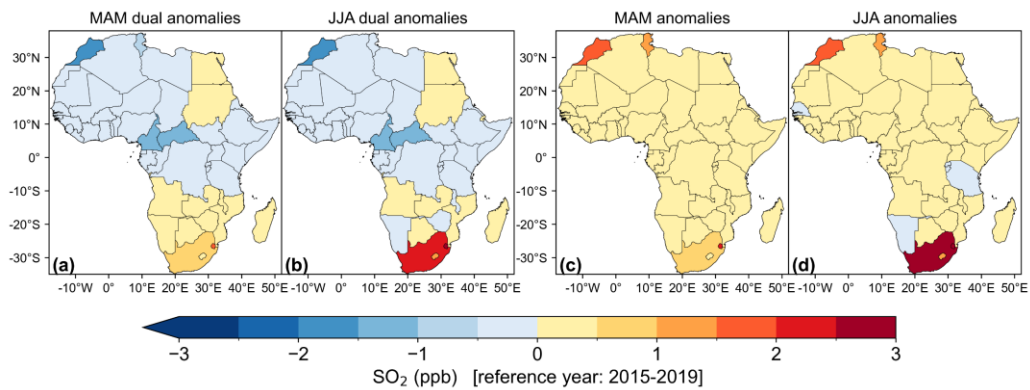

**Figure S22: The same as Fig. S19, but for SO<sub>2</sub>. The units are ppbv.**

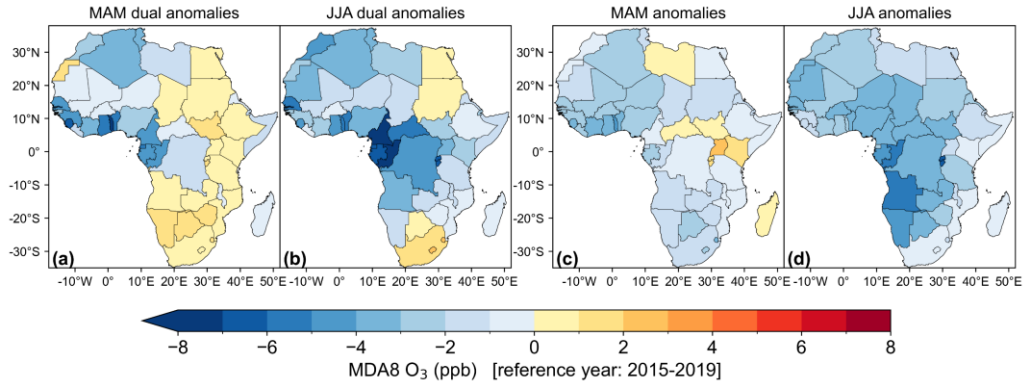

Figure S23: The same as Fig. S19, but for MDA8 O<sub>3</sub>. The units are ppbv.

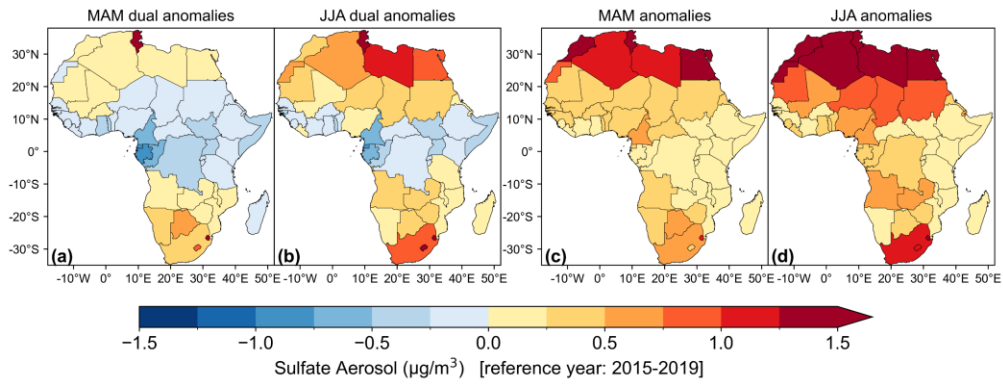

Figure S24: The same as Fig. S19, but for sulfate aerosol. The units are µg/m<sup>3</sup>.

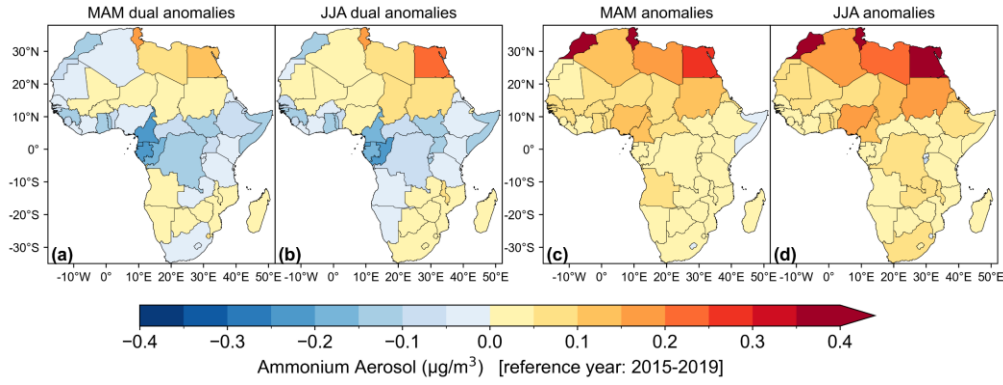

Figure S25: The same as Fig. S19, but for ammonium aerosol. The units are µg/m<sup>3</sup>.

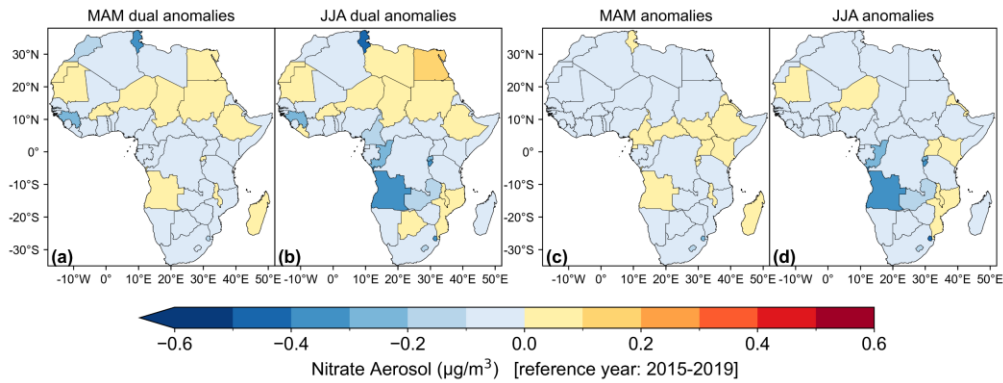

Figure S26: The same as Fig. S19, but for nitrate aerosol. The units are µg/m<sup>3</sup>.



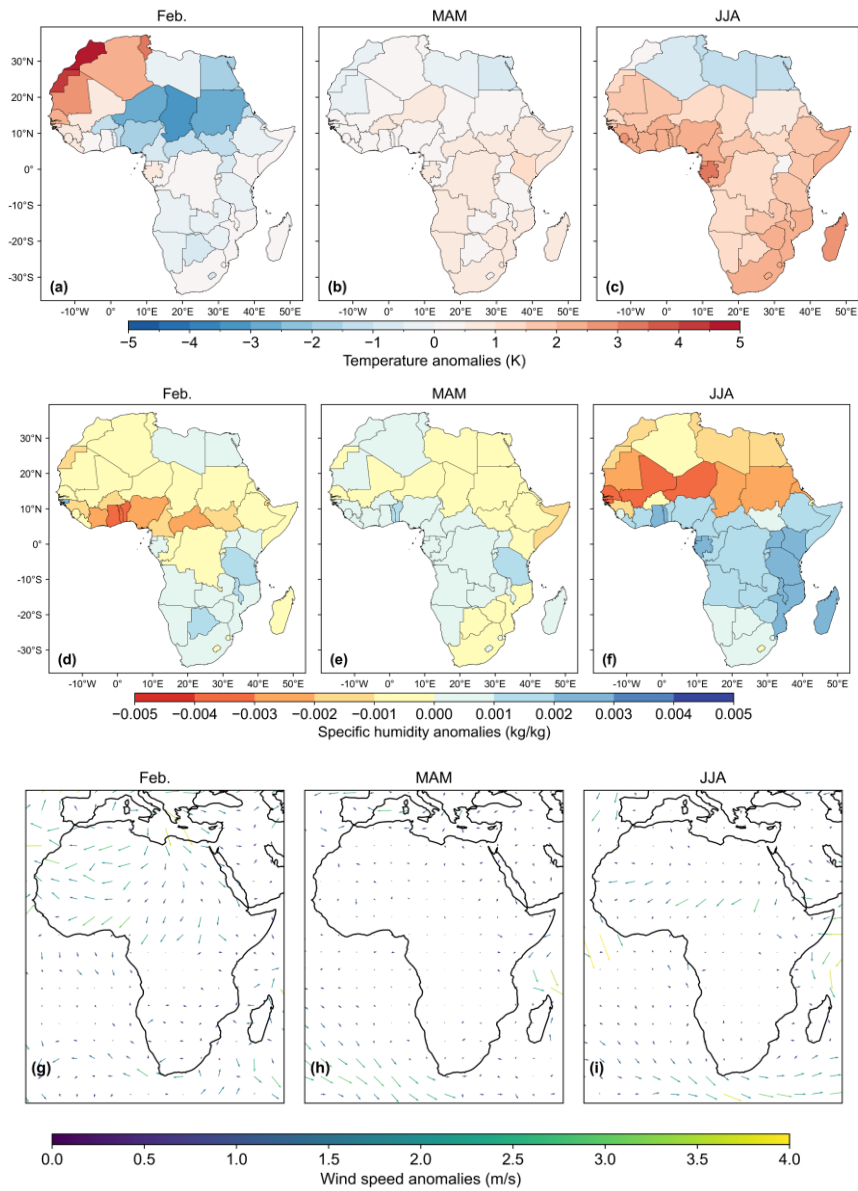

**Figure S27: Spatial distribution of (a-c) 2-m temperature (d-f) specific humidity anomalies for Feb., MAM and JJA in African countries and (g-i) wind direction anomalies in African major continents. The differences were calculated between 2020 and 5-year average (2015-2019).**

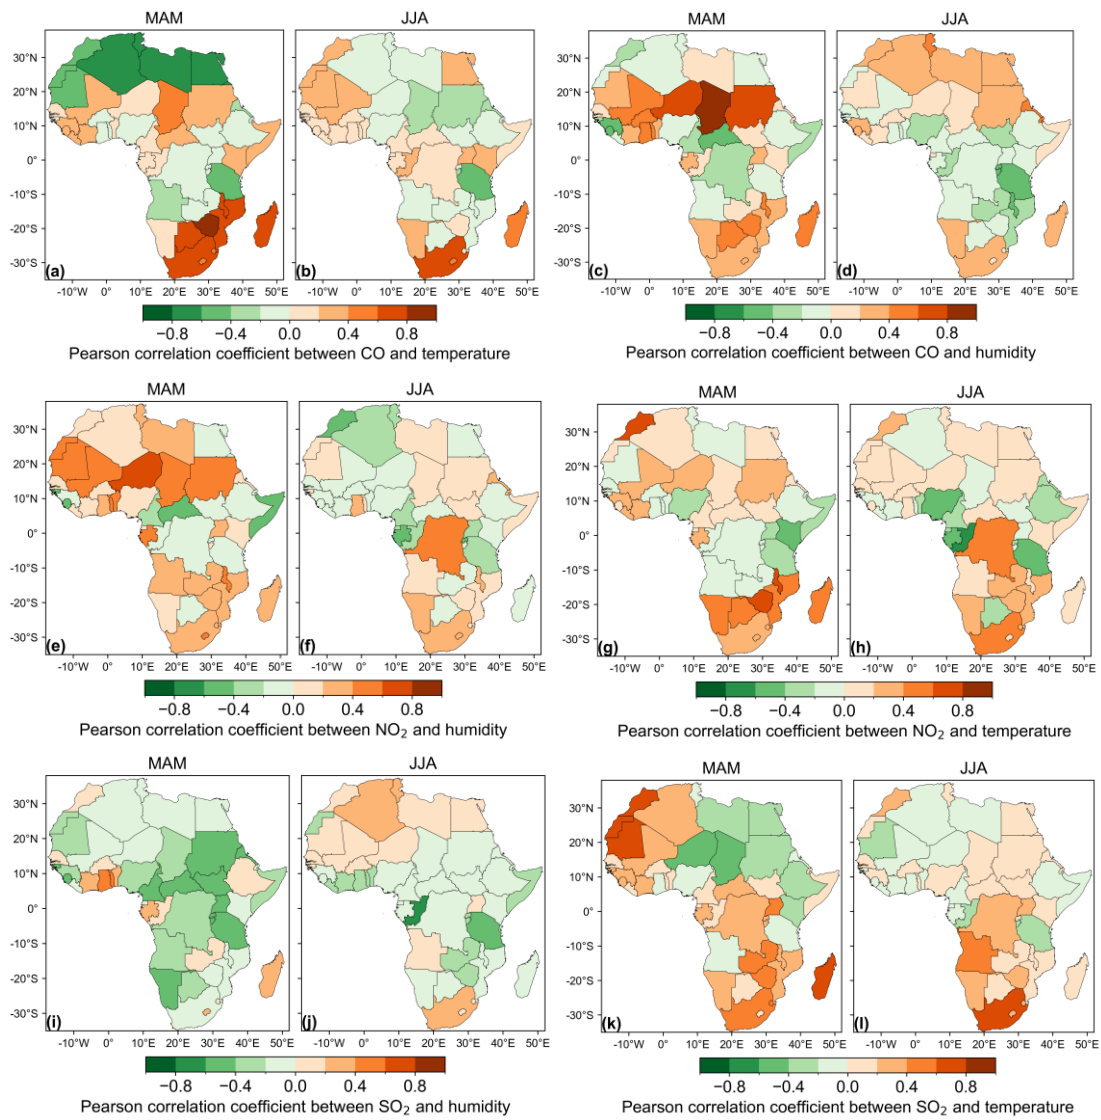

**Figure S28: Pearson correlation coefficient of (a, b) CO and T, (c, d) CO and humidity, (e, f) NO<sub>2</sub> and humidity, (g, h) NO<sub>2</sub> and T, (i, j) SO<sub>2</sub> and humidity, (k, l) SO<sub>2</sub> and T for MAM and JJA in African countries.**

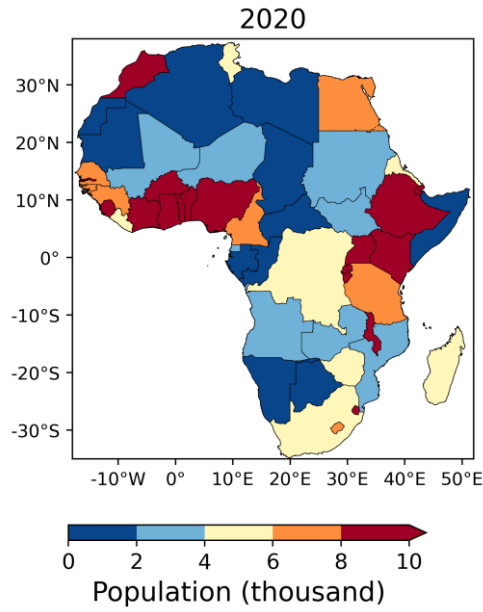

**Figure S29: Population in 2020 in African countries. Units are thousand.**

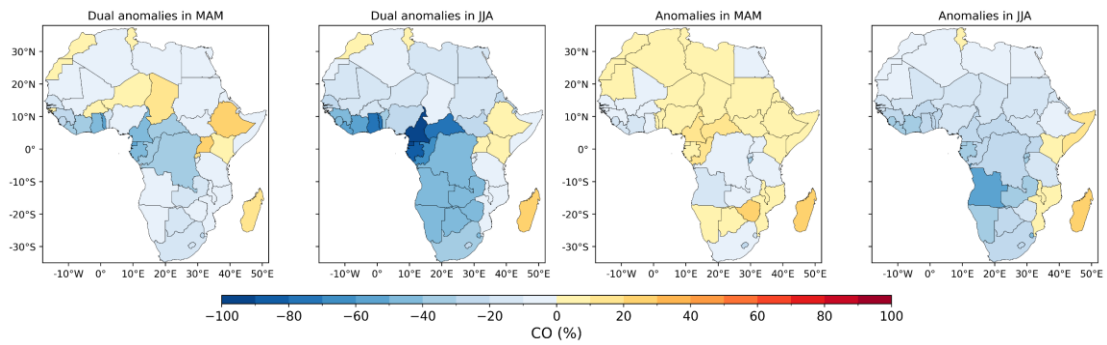

**Figure S30: Spatial distribution of CO percentage quarterly dual anomalies (a, b), and percentage quarterly anomalies (c, d; calculated between 2020 and 15-year average from 2005-2019) in MAM and JJA in African countries.**

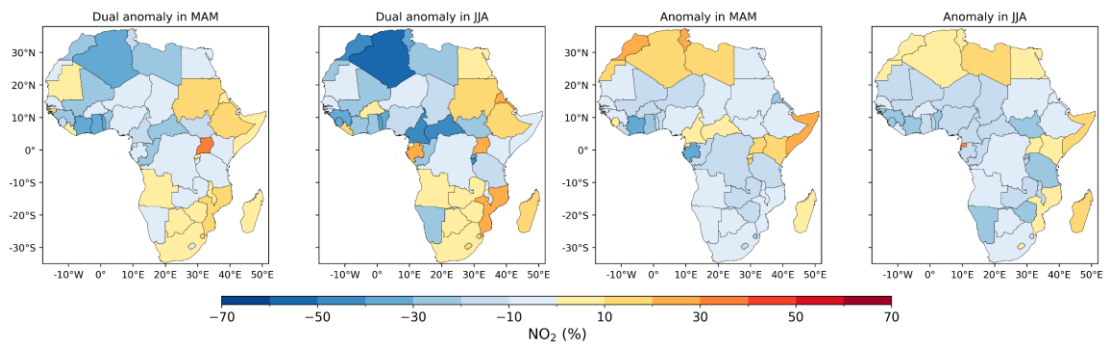

**Figure S31: The same as Fig. S29, but for NO<sub>2</sub>.**

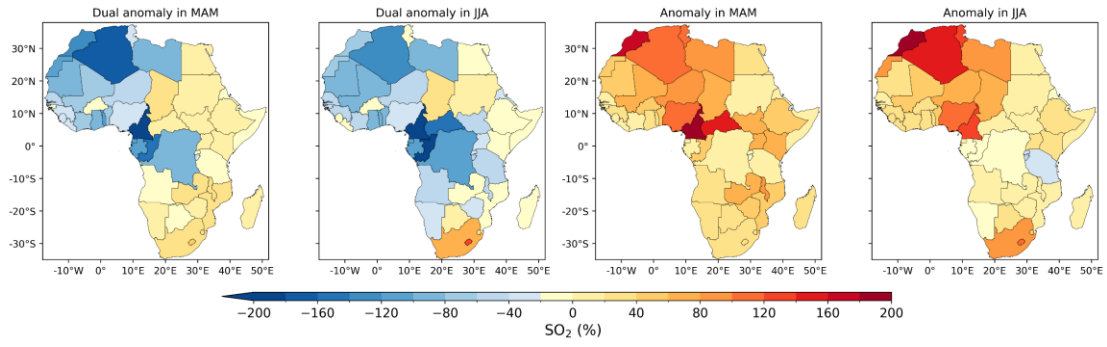

Figure S32: The same as Fig. S29, but for SO<sub>2</sub>.

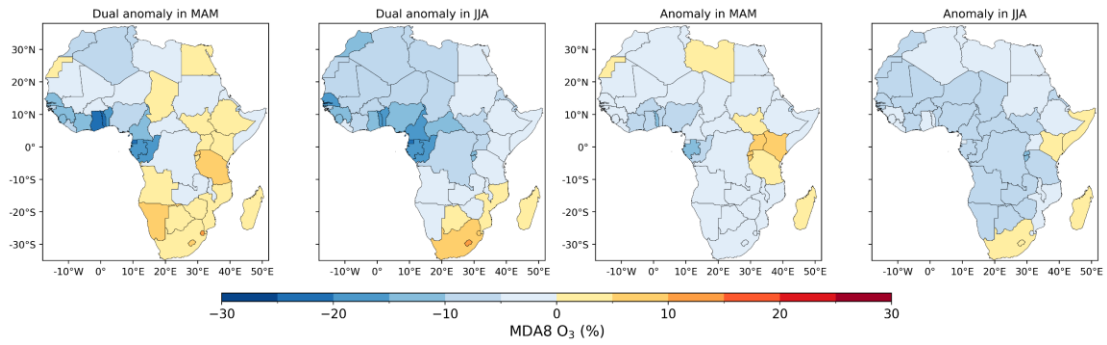

Figure S33: The same as Fig. S29, but for MDA8 O<sub>3</sub>.

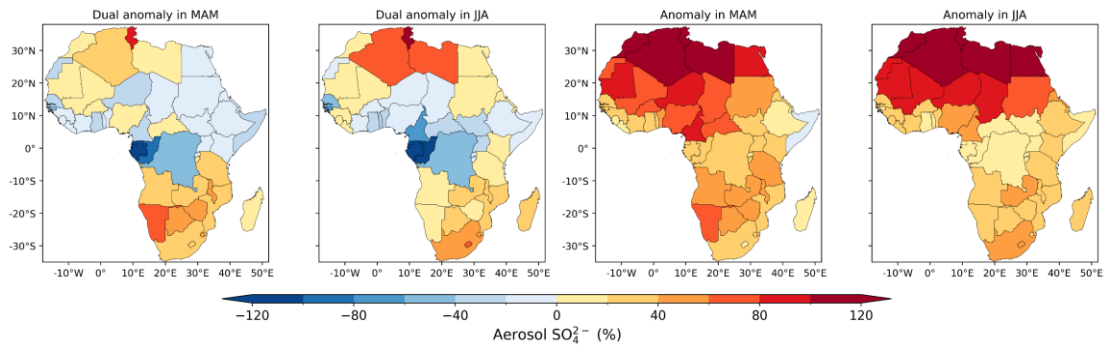

Figure S34: The same as Fig. S29, but for sulfate aerosol.

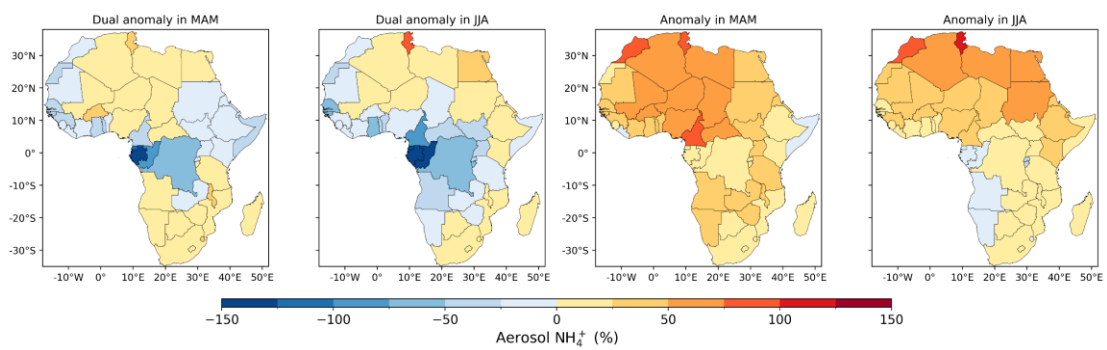

Figure S35: The same as Fig. S29, but for ammonium aerosol.



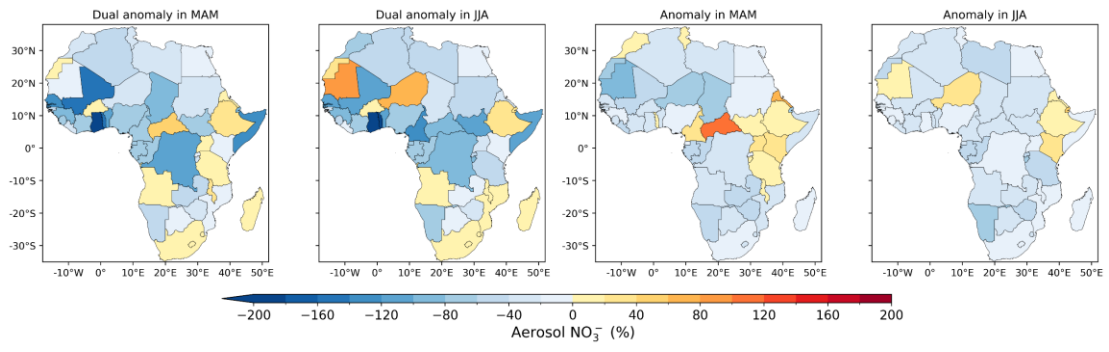

**Figure S36: The same as Fig. S29, but for nitrate aerosol.**
